# Supplementary material for: Developing SHP2-based combination therapy for KRAS-amplified cancer
Source: JCI journal article supplement (doi:10.1172/jci.insight.152714), 2023-02-07
Supplement: sd5 [file 5]

| NCBI gene name | KRAS-Amp average LFC | HUG1N_Average LFC | KE39_Average LFC |
|----------------|----------------------|-------------------|------------------|
| SHOC2          | -0.849053638         | -0.705793476      | -1.070867237     |
| RIC1           | -0.664634809         | -0.175073122      | -0.07386207      |
| GAREM1         | -0.633357969         | -0.111022561      | -0.385776668     |
| CRKL           | -0.603319683         | 0.05147354        | -0.691464542     |
| RAPGEF1        | -0.506082268         | -0.168146203      | -0.30599589      |
| RUNX1          | -0.481415975         | 0.046781265       | -0.418776398     |
| BRAF           | -0.475473913         | -0.40982565       | -0.207155527     |
| TCF7L2         | -0.470729771         | 0.287593117       | -0.395385254     |
| CHD2           | -0.459945366         | 0.220165426       | -0.445184138     |
| VPS16          | -0.426570346         | -0.393247976      | 0.050144453      |
| ARID5B         | -0.417067522         | -0.236614235      | -0.242428717     |
| PFDN5          | -0.416074033         | -0.31470112       | 0.020717335      |
| RAF1           | -0.403037206         | -0.148506848      | -0.626574436     |
| ELOVL1         | -0.398082115         | -0.348393073      | 0.039530661      |
| SHC1           | -0.382743707         | 0.186539286       | -0.246892333     |
| CREBBP         | -0.37469734          | -0.216351168      | -0.38903409      |
| SRC            | -0.374487142         | -0.117668189      | 0.02852831       |
| ERBB2          | -0.367671205         | 0.012245085       | -0.047067747     |
| PTK2           | -0.36143423          | -0.003393716      | -0.710412846     |
| PPP1CA         | -0.330288982         | -0.06638371       | -0.000243993     |
| PRKCE          | -0.326442408         | -0.260418456      | -0.30893687      |
| GATA6          | -0.321955254         | 0.346033833       | -0.491015324     |
| RAC1           | -0.31209957          | -0.082078943      | -0.569306988     |
| PFDN1          | -0.306308003         | -0.46857023       | -0.294679139     |
| KRAS           | -0.299735768         | -0.087104769      | -0.403869661     |
| TRIM64C        | -0.289420438         | 0.002068834       | -0.117086657     |
| RAB6C          | -0.275942456         | 0.103403485       | -0.276462272     |
| RCE1           | -0.275095425         | -0.13621763       | -0.03596661      |
| YES1           | -0.271562584         | 0.138114276       | -0.092984149     |
| PAK1           | -0.261560016         | 0.053349611       | -0.320305909     |
| EGFR           | -0.260974659         | 0.254557471       | -0.211372077     |
| SPNS1          | -0.257515796         | -0.712295448      | 0.056127257      |
| UGCG           | -0.256637556         | -0.052946799      | -0.616136209     |
| SIRT1          | -0.250138412         | 0.073929797       | -0.438741096     |
| NFE2L2         | -0.248027367         | -0.070899376      | -0.120493286     |
| SPTLC1         | -0.234316482         | -0.286857704      | -0.098196821     |
| TUBGCP2        | -0.231081866         | 0.073584906       | -0.113759938     |
| VPS11          | -0.230791999         | -0.370664951      | -0.091203055     |
| MAP2K1         | -0.22537657          | 0.133864957       | -0.124322239     |
| NEDD9          | -0.224133048         | 0.111913292       | -0.403852651     |
| STAM           | -0.222285062         | -0.312131756      | -0.235430416     |
| CERS2          | -0.221896976         | -0.55578617       | -0.140682248     |
| INPP5A         | -0.219176487         | -0.047061779      | -0.405040591     |
| BPTF           | -0.217788641         | -0.30252938       | 0.021077077      |
| SPTLC2         | -0.211414348         | -0.28087425       | 0.094481601      |
| APC            | -0.207614181         | -0.051952662      | -0.11703524      |

|          |              |              |              |
|----------|--------------|--------------|--------------|
| DPM2     | -0.194347377 | 0.094445244  | -0.517756535 |
| PPP1R7   | -0.193448199 | -0.074949335 | -0.196435645 |
| HDAC4    | -0.190542772 | -0.101584916 | 0.177021273  |
| METTL5   | -0.1836834   | -0.040419658 | -0.413663992 |
| SET      | -0.182410935 | 0.107313945  | -0.40768372  |
| YAP1     | -0.182294636 | -0.155088647 | -0.265200263 |
| JUN      | -0.181471525 | -0.064740047 | -0.290809296 |
| VPS18    | -0.181379764 | -0.260202344 | -0.286850251 |
| PLCE1    | -0.17898646  | -0.007638288 | -0.113491974 |
| PLAGL2   | -0.178332991 | 0.064473687  | -0.642422574 |
| JAK1     | -0.173506168 | 0.132362922  | 0.175077355  |
| BCL2L1   | -0.172440822 | 0.161799474  | -0.021936902 |
| TMEM263  | -0.172398251 | -0.309871666 | -0.068078744 |
| FGFR4    | -0.171906142 | -0.121905297 | -0.381775926 |
| PREB     | -0.169982437 | 0.031916592  | -0.583229843 |
| IRS1     | -0.16907987  | -0.039979347 | 0.154450614  |
| VPS45    | -0.164375815 | -0.35765977  | 0.273316061  |
| EED      | -0.160525545 | 0.099925865  | -0.350649539 |
| FGFR3    | -0.155976561 | 0.10987902   | -0.178861904 |
| NOX1     | -0.149978883 | 0.088833534  | 0.098920434  |
| CTNNB1   | -0.145453343 | 0.102120817  | -0.083719194 |
| MAGEA12  | -0.144124708 | -0.144166926 | -0.100602484 |
| TUBB     | -0.143492511 | 0.052203076  | -0.100701541 |
| HDAC6    | -0.14211336  | -0.05812194  | 0.110165149  |
| LGALS7   | -0.141765496 | -0.091426257 | -0.080765717 |
| CNKSR1   | -0.141174556 | 0.006949786  | -0.053507987 |
| ARSI     | -0.138575976 | 0.166721635  | -0.488739398 |
| ST3GAL6  | -0.134131781 | -0.268083678 | -0.005578212 |
| BCL2     | -0.131695477 | -0.281563757 | -0.069498984 |
| RALGAPA2 | -0.130598344 | 0.228838817  | 0.09881878   |
| STK3     | -0.130165855 | 0.011555739  | 0.377958423  |
| FLVCR1   | -0.130015368 | -0.320856415 | 0.456361387  |
| RSPH3    | -0.12965438  | -0.292668052 | -0.356639354 |
| EZH2     | -0.128926683 | 0.054066583  | -0.190202306 |
| CBL      | -0.125992453 | -0.250949222 | -0.028011706 |
| SLC22A25 | -0.125646536 | 0.056432243  | -0.421345781 |
| FRK      | -0.125456326 | 0.013449111  | 0.005802539  |
| TP53     | -0.12470297  | -0.056525986 | 0.071436444  |
| TIAM1    | -0.124092187 | 0.076775003  | 0.085610325  |
| LGALS7B  | -0.123050205 | -0.114016123 | -0.140150242 |
| CASP8    | -0.12200876  | 0.101268717  | -0.044279111 |
| PANX1    | -0.121844035 | -0.260952835 | -0.26569844  |
| CASP7    | -0.121054288 | -0.198941249 | -0.156351497 |
| VPS39    | -0.120734151 | -0.305304404 | -0.313429549 |
| TRAPPC4  | -0.11892367  | -0.008309275 | -0.328836772 |
| TP73     | -0.117944138 | -0.098904141 | 0.110951265  |
| KSR1     | -0.117890114 | 0.111126409  | -0.028536245 |

|        |              |              |              |
|--------|--------------|--------------|--------------|
| PIK3R2 | -0.117884624 | 0.151511285  | 0.10508709   |
| SPRR1A | -0.117345693 | 0.005616216  | -0.158901559 |
| SPRY1  | -0.116797719 | 0.006438339  | 0.029882828  |
| HDAC11 | -0.116419858 | -0.066938518 | -0.006965199 |
| RGL2   | -0.114528296 | -0.024779377 | 0.006730734  |
| PIK3CG | -0.114427501 | 0.087143116  | -0.068323514 |
| KPNB1  | -0.112694788 | 0.357485778  | -0.465229454 |

| KE39 Average LFCsecondary | CAT12_Average LFC | YCC1_Average LFC | GSU_Average LFC |
|---------------------------|-------------------|------------------|-----------------|
| -0.94761092               | -0.3571548        | -1.242395192     | -0.710917346    |
| -1.456155728              | -0.650424115      | 0.112675416      | -0.076872614    |
| -0.811942482              | -0.025729587      | -1.062401837     | -0.739719427    |
| -0.742967739              | -0.747375014      | -0.319616295     | -0.932790543    |
| -0.352787124              | -0.929604116      | -0.235855565     | -0.582358826    |
| -1.811824239              | 0.067031341       | 0.300544972      | -0.070427758    |
| -0.80633452               | -0.038446575      | -0.581640645     | -0.883558191    |
| -0.67766503               | -0.105701186      | -0.628823097     | -0.3465332      |
| -0.170965332              | -0.522602155      | -0.686268613     | -0.132948445    |
| -0.523315773              | 0.0770044         | -0.833399665     | -0.208065072    |
| -0.846632887              | -0.296693261      | -0.107876418     | 0.176347817     |
| -0.50101117               | -0.656894132      | -0.090316796     | -0.496902368    |
| -0.619155089              | -0.003991217      | -0.585965311     | -0.609396003    |
| -0.372215527              | -0.272530325      | -0.549500492     | -0.216634927    |
| -0.174281678              | -1.14833313       | 0.174383688      | -0.44281358     |
| -0.437219483              | -0.408590155      | -0.278282383     | -1.455171239    |
| -0.380393974              | -0.502866115      | -0.240201338     | -0.241412421    |
| -0.753637452              | -0.414714534      | 0.065338372      | -0.083026806    |
| -0.472186475              | -0.486247432      | -0.125868782     | -0.503163264    |
| -0.319327301              | -0.521217247      | -0.150322399     | -0.299753144    |
| -0.212873449              | 0.040683342       | -0.807137116     | -0.695161777    |
| -0.566126425              | -0.083570175      | -0.316169163     | -0.198129149    |
| -0.303353844              | -0.607218391      | -0.025726475     | -0.589628066    |
| -0.279019062              | -0.695127951      | 0.055223004      | -0.104067237    |
| -0.608876544              | -0.601575193      | 0.311244433      | -0.289619922    |
| -0.774391769              | 0.037202607       | -0.131072152     | -0.462930887    |
| -0.134178927              | -0.239479676      | -0.454168766     | -0.557564852    |
| -0.011102967              | -0.383804512      | -0.430378796     | -0.000239135    |
| -0.218261277              | -0.35589573       | -0.240530745     | -0.402277375    |
| -0.363060494              | -0.238431933      | -0.183187623     | -0.434812132    |
| -0.591135872              | -1.395886031      | 1.204097927      | 0.116815884     |
| -0.02947583               | 0.02591253        | -0.768984086     | -0.280340023    |
| -0.528062257              | -0.10874899       | -0.133101422     | -0.083684845    |
| -0.70377265               | 0.07979676        | -0.126439347     | -0.408321932    |
| 0.041506423               | -0.431417564      | -0.35417096      | -0.508149392    |
| -0.43650072               | -0.098182973      | -0.168265753     | -0.322467988    |
| -0.600993743              | -0.256803569      | 0.164551714      | -0.213616929    |
| -0.324323816              | 0.171227061       | -0.539279244     | -0.383043499    |
| 0.055629784               | -0.288504641      | -0.443254853     | -0.251823721    |
| -0.153556687              | -0.300588166      | -0.218254292     | -0.159948402    |
| -0.210367089              | -0.001046131      | -0.455441965     | -0.51767665     |
| -0.21597452               | -0.121221117      | -0.328495291     | 0.12176719      |
| -0.249119052              | -0.385880287      | -0.022530122     | -0.061955571    |
| -0.272314882              | -0.371731386      | -0.009319654     | -0.269641138    |
| -0.161594715              | -0.096164361      | -0.376483969     | -0.132020805    |
| -0.219960214              | -0.130689604      | -0.272192726     | -1.160650657    |

|              |              |              |              |
|--------------|--------------|--------------|--------------|
| -0.300895246 | -0.339225762 | 0.057078877  | -0.47825326  |
| -0.160682895 | -0.309141778 | -0.110519924 | -1.042666407 |
| -0.229846282 | -0.183163245 | -0.158618789 | -0.42841275  |
| -0.232465099 | -0.26189476  | -0.05669034  | -0.459024957 |
| -0.154390162 | -0.029657467 | -0.363185177 | 0.057327021  |
| -0.273212021 | -0.320986696 | 0.047314808  | -0.131014939 |
| -0.630699123 | 0.177671979  | -0.09138743  | 0.299327394  |
| -0.273572351 | -0.081280669 | -0.189286272 | -0.194290176 |
| -0.103216189 | -0.187952781 | -0.24579041  | -0.318791061 |
| -0.291035375 | -0.122055159 | -0.12190844  | -0.364948486 |
| -0.171116825 | -0.388698618 | 0.039296937  | -0.129216416 |
| -0.108446715 | -0.353046734 | -0.055829017 | 0.167085649  |
| -0.068663169 | -0.31791284  | -0.130618745 | -0.259499596 |
| -0.486300522 | -0.004784744 | -0.024633159 | -0.267083454 |
| -0.271140221 | -0.316742823 | 0.077935734  | -0.704025938 |
| -0.107106243 | -0.293022137 | -0.107111231 | -0.240257637 |
| -0.131557156 | 0.165497186  | -0.527067475 | 0.146367996  |
| -0.200150971 | 0.168307033  | -0.449732698 | -0.176845447 |
| -0.480375291 | 0.025366368  | -0.012920761 | -0.240072604 |
| -0.286327351 | -0.070110826 | -0.093498472 | -0.239490666 |
| -0.487254647 | 0.222732843  | -0.171838225 | 0.533072415  |
| -0.039226711 | -0.218560979 | -0.174586433 | -0.111550145 |
| -0.207244169 | -0.420558672 | 0.197325308  | -0.379960492 |
| -0.342230747 | -0.150866674 | 0.066757342  | -0.158283092 |
| -0.161547642 | -0.219442784 | -0.044306062 | -0.37586568  |
| -0.108391597 | -0.238906505 | -0.076225566 | -0.323935051 |
| -0.129069118 | -0.121055319 | -0.165603491 | -0.187272519 |
| -0.130240962 | -0.070657277 | -0.201497106 | -0.061424622 |
| -0.238926613 | -0.042814563 | -0.113345257 | -0.278896055 |
| -0.313738686 | -0.07619278  | -0.001863565 | -0.384094099 |
| -0.255484545 | -0.124728129 | -0.010284892 | -0.521920577 |
| -0.099055456 | -0.198100172 | -0.092890477 | 0.19052116   |
| -0.155095995 | -0.103067112 | -0.130800032 | -0.159643795 |
| 0.078242639  | 0.034881325  | -0.499904012 | -0.116613808 |
| 0.067284271  | -0.087162524 | -0.358099105 | -0.123368568 |
| 0.012929795  | -0.347660521 | -0.042208882 | 0.076238455  |
| -0.229679581 | 0.006194707  | -0.152884104 | -0.064659316 |
| -0.205426754 | -0.133376395 | -0.035305762 | -0.304343585 |
| -0.050570667 | -0.225176114 | -0.09652978  | -0.157342503 |
| -0.061613451 | -0.229888013 | -0.077649153 | -0.272792746 |
| -0.138841026 | -0.074353422 | -0.152831834 | -0.202282926 |
| -0.119575554 | -0.215350245 | -0.030606307 | -0.194021431 |
| -0.069737554 | -0.127111743 | -0.166313567 | -0.115323696 |
| -0.325174266 | 0.041514305  | -0.078542493 | -0.573363094 |
| -0.29937237  | -0.240966128 | 0.183567489  | -0.047389417 |
| -0.041150906 | -0.112199096 | -0.200482412 | -0.086719152 |
| -0.030656885 | -0.234690023 | -0.088323433 | 0.059869068  |

|              |              |              |              |
|--------------|--------------|--------------|--------------|
| -0.365674206 | -0.006187774 | 0.018208107  | 0.021136926  |
| -0.156633521 | -0.191081071 | -0.004322487 | -0.583423498 |
| -0.011223118 | -0.111296834 | -0.227873205 | -0.176893175 |
| -0.107275598 | -0.133845538 | -0.108138439 | -0.287134608 |
| -0.105905094 | -0.138128701 | -0.099551094 | -0.557502914 |
| 0.057237218  | -0.180906371 | -0.21961335  | -0.086804005 |
| -0.016503581 | -0.154693148 | -0.166887635 | -0.438135466 |
